Articles of interest in other COB journals

From *Journal of Cell Science*

**The endocytic control of JAK/STAT signalling in *Drosophila***

Olivier Devergne, Christian Ghiglione and Stéphane Noselli

Devergne, O. et al. 2007. *J. Cell Sci.* doi:10.1242/jcs.005926

**mDia2 regulates actin and focal adhesion dynamics and organization in the lamella for efficient epithelial cell migration**

Stephanie L. Gupton, Kathryn Eisenmann, Arthur S. Alberts and Clare M. Waterman-Storer

Gupton, S. L. et al. 2007. *J. Cell Sci.* doi:10.1242/jcs.006049
